CORRECTION

# Correction: Stating Appointment Costs in SMS Reminders Reduces Missed Hospital Appointments: Findings from Two Randomised Controlled Trials

Michael Hallsworth, Dan Berry, Michael Sanders, Anna Sallis, Dominic King, Ivo Vlaev, Ara Darzi

The affiliation for the sixth author is incorrect. Ivo Vlaev is not affiliated with #1, but with Warwick Business School, University of Warwick, Coventry, United Kingdom.

## Reference

1. Hallsworth M, Berry D, Sanders M, Sallis A, King D, Vlaev I, et al. (2015) Stating Appointment Costs in SMS Reminders Reduces Missed Hospital Appointments: Findings from Two Randomised Controlled Trials. PLoS ONE 10(9): e0137306. doi:[10.1371/journal.pone.0137306](https://doi.org/10.1371/journal.pone.0137306) PMID: [26366885](https://pubmed.ncbi.nlm.nih.gov/26366885/)

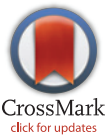

## OPEN ACCESS

**Citation:** Hallsworth M, Berry D, Sanders M, Sallis A, King D, Vlaev I, et al. (2015) Correction: Stating Appointment Costs in SMS Reminders Reduces Missed Hospital Appointments: Findings from Two Randomised Controlled Trials. PLoS ONE 10(10): e0141461. doi:[10.1371/journal.pone.0141461](https://doi.org/10.1371/journal.pone.0141461)

**Published:** October 20, 2015

**Copyright:** © 2015 Hallsworth et al. This is an open access article distributed under the terms of the [Creative Commons Attribution License](https://creativecommons.org/licenses/by/4.0/), which permits unrestricted use, distribution, and reproduction in any medium, provided the original author and source are credited.
